# Supplementary material for: Alcohol Consumption Is Associated With Postablation Recurrence but Not Changes in Atrial Substrate in Patients With Atrial Fibrillation: Insight from a High‐Density Mapping Study
Source: PubMed Central journal article supplement — J Am Heart Assoc. 2022 Jun 29;11(13):e025697. doi: 10.1161/JAHA.121.025697 (PMC9333400; doi:10.1161/jaha.121.025697), 2022-06-29
Supplement: JAH3-11-e025697-s001.pdf [file JAH3-11-e025697-s001.pdf]

# **SUPPLEMENTAL MATERIAL**

**Table S1. Uni- and multivariate analyses of mean LA voltage.**

|                                            | Univariate analysis |         | Multivariate analysis |       |         |
|--------------------------------------------|---------------------|---------|-----------------------|-------|---------|
|                                            | P value             | $\beta$ | 95% CI                | t     | P value |
| Age, years                                 | <0.001              | -0.284  | -0.065, -<br>0.017    | -3.42 | <0.001  |
| Female, n (%)                              | <0.001              | 0.382   | 0.387,<br>0.941       | 4.76  | <0.001  |
| BMI, kg/m <sup>2</sup>                     | 0.238               |         |                       |       |         |
| Alcohol consumption >7 drinks/weeks, n (%) | 0.554               |         |                       |       |         |
| Alcohol consumption, n (%)                 | 0.252               |         |                       |       |         |
| AF type, n (%)                             | 0.029               | -0.208  | -0.646, -<br>0.072    | -2.48 | 0.015   |
| Duration of AF history, years              | 0.848               |         |                       |       |         |
| Hypertension, n (%)                        | 0.499               |         |                       |       |         |
| Heart failure, n (%)                       | 0.041               | 0.044   | -0.364,<br>0.568      | 0.43  | 0.665   |
| Chronic kidney disease, n (%)              | 0.029               | 0.048   | -0.461,<br>0.756      | 0.48  | 0.631   |
| LV ejection fraction, %                    | 0.859               |         |                       |       |         |
| LA diameter, mm                            | 0.005               | -0.152  | -0.096,<br>0.003      | -1.85 | 0.068   |
| Antiarrhythmic drugs, numbers              | 0.176               |         |                       |       |         |

*P* values were determined using multiple linear regression analysis. LA, left atrial; CI, confidence interval;

BMI, body mass index; AF, atrial fibrillation; LV, left ventricular

**Table S2. Uni- and multivariate analyses of % LVZ.**

|                                           | Univariate analysis | Multivariate analysis |                   |       |         |
|-------------------------------------------|---------------------|-----------------------|-------------------|-------|---------|
|                                           | P value             | $\beta$               | 95% CI            | t     | P value |
| Age, years                                | 0.069               |                       |                   |       |         |
| Female, n (%)                             | 0.015               | -0.228                | -2.341,<br>-0.282 | -2.53 | 0.013   |
| BMI, kg/m <sup>2</sup>                    | 0.521               |                       |                   |       |         |
| Alcohol consumption >7 drinks/week, n (%) | 0.756               |                       |                   |       |         |
| Alcohol consumption, n (%)                | 0.601               |                       |                   |       |         |
| AF type, n (%)                            | 0.552               |                       |                   |       |         |
| Duration of AF history, years             | 0.931               |                       |                   |       |         |
| Hypertension, n (%)                       | 0.530               |                       |                   |       |         |
| Heart failure, n (%)                      | 0.109               |                       |                   |       |         |
| Chronic kidney disease, n (%)             | 0.024               | -0.173                | -3.602,<br>0.071  | -1.91 | 0.059   |
| LV ejection fraction, %                   | 0.101               |                       |                   |       |         |
| LA diameter, mm                           | 0.011               | 0.218                 | 0.038, 0.401      | 2.40  | 0.018   |
| Antiarrhythmic drugs, numbers             | 0.870               |                       |                   |       |         |

*P* values were determined using multiple linear regression analysis. LVZ, low voltage zone; CI, confidence interval; BMI, body mass index; AF, atrial fibrillation; LV, left ventricular; LA, left atrial

**Table S3. Uni- and multivariate analyses of slow conduction length.**

|                                            | Univariate | Multivariate analysis |                |       |         |
|--------------------------------------------|------------|-----------------------|----------------|-------|---------|
|                                            | analysis   | $\beta$               | 95% CI         | t     | P value |
|                                            | P value    |                       |                |       |         |
| Age, years                                 | 0.032      | 0.189                 | 0.008, 0.730   | 2.03  | 0.045   |
| Female, n (%)                              | 0.051      |                       |                |       |         |
| BMI, kg/m <sup>2</sup>                     | 0.673      |                       |                |       |         |
| Alcohol consumption >7 drinks/weeks, n (%) | 0.444      |                       |                |       |         |
| Alcohol consumption, n (%)                 | 0.834      |                       |                |       |         |
| AF type, n(%)                              | 0.594      |                       |                |       |         |
| Duration of AF history, years              | 0.200      |                       |                |       |         |
| Hypertension, n (%)                        | 0.947      |                       |                |       |         |
| Heart failure, n (%)                       | 0.039      | -0.182                | -11.565, 0.730 | -1.95 | 0.054   |
| Chronic kidney disease, n (%)              | 0.111      |                       |                |       |         |
| LV ejection fraction, %                    | 0.114      |                       |                |       |         |
| LA diameter, mm                            | 0.172      |                       |                |       |         |
| Antiarrhythmic drugs, numbers              | 0.134      |                       |                |       |         |

*P* values were determined using multiple linear regression analysis. CI, confidence interval; BMI, body mass index; AF, atrial fibrillation; LV, left ventricular; LA, left atrial

**Table S4. Relationship between AF recurrence after a single ablation and alcohol consumption after covariate adjustment.**

|                     | <b>Multivariate analysis</b> |               |                |
|---------------------|------------------------------|---------------|----------------|
|                     | <b>HR</b>                    | <b>95% CI</b> | <b>P value</b> |
| Alcohol consumption | 3.55                         | 1.12-11.26    | 0.031          |
| Female, n (%)       | 1.51                         | 0.59-3.86     | 0.391          |
| Hypertension, n (%) | 1.39                         | 0.44-4.40     | 0.579          |

*P* values, hazard ratios and 95% confidence interval were determined by a multivariate Cox proportional analysis. AF, atrial fibrillation; HR, hazard ratio; CI, confidence interval
